# Supplementary material
Source: PubMed Central journal article supplement (PMC5362316)
Supplement: NIHMS830353-supplement.pdf [file NIHMS830353-supplement.pdf]

# CONFLICT OF INTEREST STATEMENT

## *The Journal of Arthroplasty*

(Adopted from the American Academy of Orthopaedic Surgeons disclosure statement)

The following form **must be filled out completely and submitted by each author (example, 6 authors, 6 forms)**. **If no discloser is required, please write/type "none" at the end of each sentence.**

Manuscript Title: External Validation of a Prognostic Nomogram for Predicting Nonresponse Following Knee Arthroplasty

1. Royalties from a company or supplier (The following conflicts were disclosed) NONE
2. Speakers bureau/paid presentations for a company or supplier (The following conflicts were disclosed) NONE
- 3A. Paid employee for a company or supplier (The following conflicts were disclosed) NONE
- 3B. Paid consultant for a company or supplier (The following conflicts were disclosed) NONE
- 3C. Unpaid consultants for a company or supplier (The following conflicts were disclosed) NONE
4. Stock or stock options in a company or supplier (The following conflicts were disclosed) NONE
5. Research support from a company or supplier as a Principal Investigator (The following conflicts were disclosed) NONE
6. Other financial or material support from a company or supplier (The following conflicts were disclosed) NONE
7. Royalties, financial or material support from publishers (The following conflicts were disclosed) NONE
8. Medical/Orthopaedic publications editorial/governing board (The following conflicts were disclosed) Non-paid editorial board member of the Journal of Pain.
9. Board member/committee appointments for a society (The following conflicts were disclosed) #8 above.

**Each author must sign AND print or type his/her name, date and submit a separate form**

In addition, one BLINDED Conflict of Interest form (no author names used) should be submitted per manuscript with all author disclosures.

DANIEL RIBBLE  
Author Name (Print or Type)

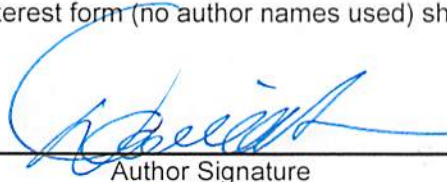  
Author Signature

8/10/16  
Date

# CONFLICT OF INTEREST STATEMENT

## *The Journal of Arthroplasty*

(Adopted from the American Academy of Orthopaedic Surgeons disclosure statement)

The following form **must be filled out completely and submitted by each author (example, 6 authors, 6 forms)**. **If no discloser is required, please write/type "none" at the end of each sentence.**

Manuscript Title

1. Royalties from a company or supplier (The following conflicts were disclosed)

OrthoSensor, Inc

2. Speakers bureau/paid presentations for a company or supplier (The following conflicts were disclosed)

OrthoSensor, Inc

3A. Paid employee for a company or supplier (The following conflicts were disclosed)

None

3B. Paid consultant for a company or supplier (The following conflicts were disclosed)

OrthoSensor, Inc, Cayenne Medical, Inc., Stryker, Inc

3C. Unpaid consultants for a company or supplier (The following conflicts were disclosed)

None

4. Stock or stock options in a company or supplier (The following conflicts were disclosed)

OrthoSensor, Inc.

5. Research support from a company or supplier as a Principal Investigator (The following conflicts were disclosed)

OrthoSensor, Inc.

6. Other financial or material support from a company or supplier (The following conflicts were disclosed)

None

7. Royalties, financial or material support from publishers (The following conflicts were disclosed)

None

8. Medical/Orthopaedic publications editorial/governing board (The following conflicts were disclosed)

Journal of Arthroplasty

9. Board member/committee appointments for a society (The following conflicts were disclosed)

AAHKS - publications committee

Virginia Orthopaedic Society - Board

Medical Society of Virginia - Specialty Society Liaison

**Each author must sign AND print or type his/her name, date and submit a separate form**

In addition, one BLINDED Conflict of Interest form (no author names used) should be submitted per manuscript with all author disclosures.

Author Name (Print or Type)  
Gregory J. Golladay, MD

Author Signature  
Gregory J. Golladay

Date  
08/11/16

*Gregory Golladay*

8/13/16

# CONFLICT OF INTEREST STATEMENT

## *The Journal of Arthroplasty*

(Adopted from the American Academy of Orthopaedic Surgeons disclosure statement)

The following form **must be filled out completely and submitted by each author (example, 6 authors, 6 forms)**. **If no discloser is required, please write/type "none" at the end of each sentence.**

Manuscript Title

1. Royalties from a company or supplier (The following conflicts were disclosed)

~~DEPUY-SYNTHES INC.~~ DEPUY-SYNTHES INC.

2. Speakers bureau/paid presentations for a company or supplier (The following conflicts were disclosed)

N/A

3A. Paid employee for a company or supplier (The following conflicts were disclosed)

N/A

3B. Paid consultant for a company or supplier (The following conflicts were disclosed)

DEPUY-SYNTHES, INC. CAYENNE MEDICAL, INC.

3C. Unpaid consultants for a company or supplier (The following conflicts were disclosed)

N/A

4. Stock or stock options in a company or supplier (The following conflicts were disclosed)

N/A

5. Research support from a company or supplier as a Principal Investigator (The following conflicts were disclosed)

STRYKER

6. Other financial or material support from a company or supplier (The following conflicts were disclosed)

N/A

7. Royalties, financial or material support from publishers (The following conflicts were disclosed)

N/A

8. Medical/Orthopaedic publications editorial/governing board (The following conflicts were disclosed)

N/A

9. Board member/committee appointments for a society (The following conflicts were disclosed)

BOD AAHKS, LIFENET

**Each author must sign AND print or type his/her name, date and submit a separate form**

In addition, one BLINDED Conflict of Interest form (no author names used) should be submitted per manuscript with all author disclosures.

WILLIAMS JURANEK

Author Name (Print or Type)

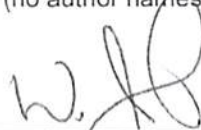

Author Signature

8/13/16

Date

# CONFLICT OF INTEREST STATEMENT

## *The Journal of Arthroplasty*

(Adopted from the American Academy of Orthopaedic Surgeons disclosure statement)

The following form **must be filled out completely and submitted by each author (example, 6 authors, 6 forms). If no disclosure is required, please write/type "none" at the end of each sentence.**

---

Manuscript Title

1. Royalties from a company or supplier (The following conflicts were disclosed) None
2. Speakers bureau/paid presentations for a company or supplier (The following conflicts were disclosed) None
- 3A. Paid employee for a company or supplier (The following conflicts were disclosed) None
- 3B. Paid consultant for a company or supplier (The following conflicts were disclosed) None
- 3C. Unpaid consultants for a company or supplier (The following conflicts were disclosed) None
4. Stock or stock options in a company or supplier (The following conflicts were disclosed) None
5. Research support from a company or supplier as a Principal Investigator (The following conflicts were disclosed)  
None
6. Other financial or material support from a company or supplier (The following conflicts were disclosed) None
7. Royalties, financial or material support from publishers (The following conflicts were disclosed) None
8. Medical/Orthopaedic publications editorial/governing board (The following conflicts were disclosed) None
9. Board member/committee appointments for a society (The following conflicts were disclosed) None

**Each author must sign AND print or type his/her name, date and submit a separate form**

In addition, one BLINDED Conflict of Interest form (no author names used) should be submitted per manuscript with all author disclosures.

Robert A. Perera

Author Name (Print or Type)



Author Signature

8/10/16

Date
